# Supplementary material
Source: publisher figshare collection journal article supplement (https://acs.figshare.com/ndownloader/files/15461918)
Supplement: Supplementary file 1 [file 15461918]

**Supporting Information**

**Multiscale Structural Characterization of  
Biocompatible Poly(trimethylene carbonate)  
Photoreticulated Networks**

Bas van Bochove,<sup>\*,†</sup> Steve Spoljaric,<sup>‡</sup> Jukka Seppälä,<sup>†</sup> Paul Sotta,<sup>¶</sup> and Agustin  
Rios de Anda<sup>\*,§</sup>

<sup>†</sup>*Polymer Technology, Department of Chemical and Metallurgical Engineering, Aalto  
University, Kemistintie 1, 02150 Espoo, Finland*

<sup>‡</sup>*ARC CoE in Convergent Bio-Nano Science and Technology, Department of Chemical and  
Biomolecular Engineering, The University of Melbourne, Grattan Street, Parkville 3010,  
Victoria, Australia*

<sup>¶</sup>*Laboratoire Polymères et Matériaux Avancés, UMR 5268 CNRS-Solvay, Solvay in  
Axel'One, 87 rue des Freres Perret, 69192, Saint Fons, France*

<sup>§</sup>*Université Paris Est Créteil, Institut de Chimie et des Matériaux Paris-Est, UMR 7182  
CNRS-UPEC, 2 rue Henri Dunant, 94320 Thiais, France*

E-mail: jan.vanbochove@aalto.fi; rios@icmpe.cnrs.fr

Phone: +35 8503154720; +33 149781228

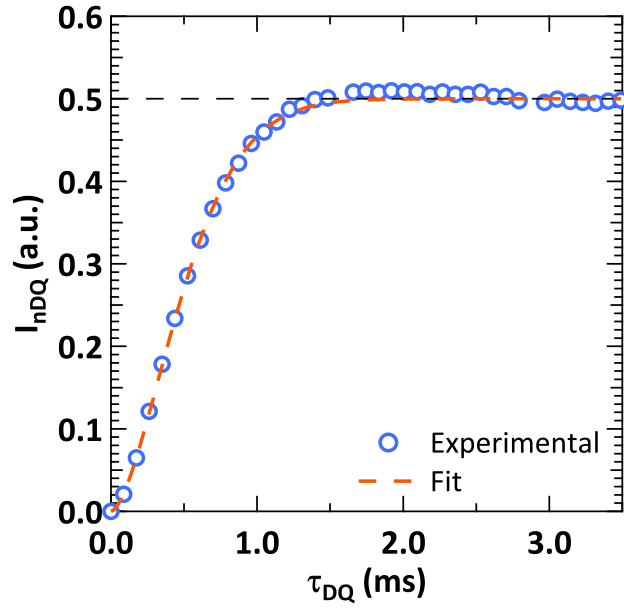

Figure SI.1:  $I_{nDQ}$  signal obtained for the PTMC 10k network at  $T_{\alpha} + 90^{\circ}\text{C}$  fitted by Equation 7.

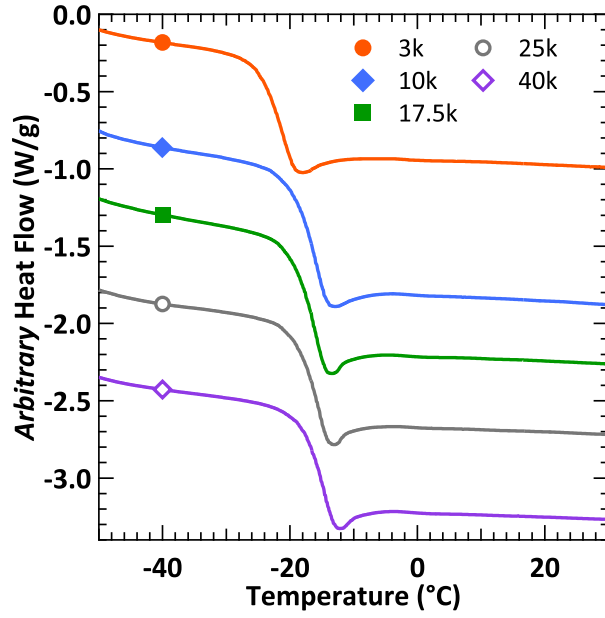

Figure SI.2: DSC Thermograms highlighting the  $T_g$  obtained for PTMC macromers.

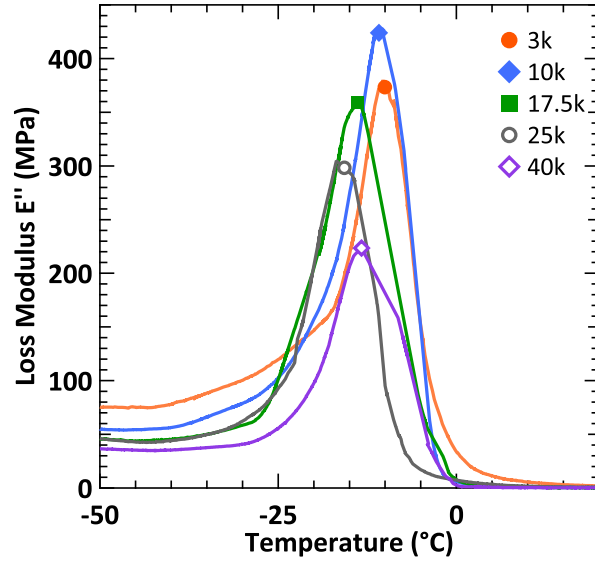

Figure SI.3: Loss modulus  $E''$  obtained for all PTMC networks as a function of temperature.

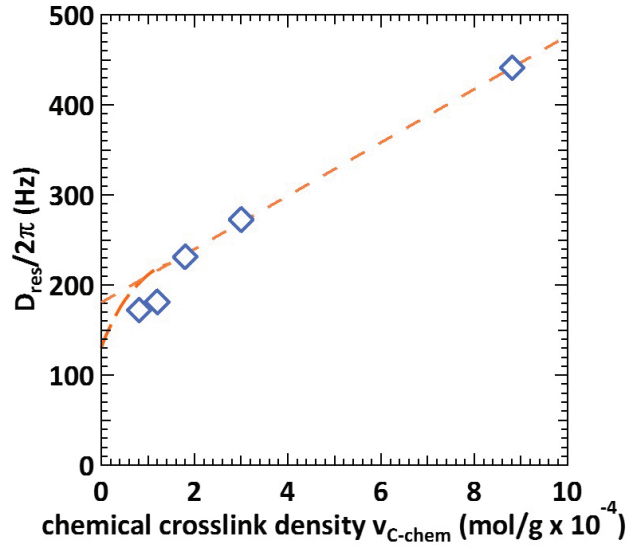

Figure SI.4:  $D_{res}$  values obtained by MQ  $^1H$  NMR measurements as a function of the chemical  $\nu_{C-chem}$  crosslink densities for all studied PTMC networks. The dashed line is a linear fit and serves as a guide for the eyes.

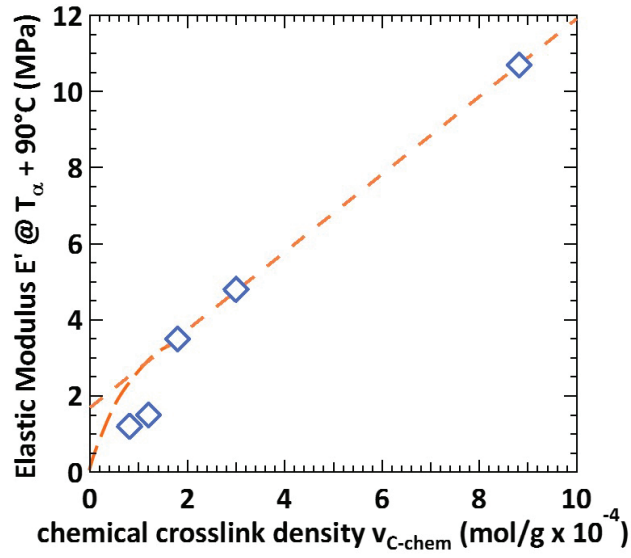

Figure SI.5:  $E'$  at  $T_{\alpha} + 90^{\circ}\text{C}$  obtained by DMA as a function of the chemical  $v_{C-chem}$  crosslink density. The dashed line is a linear fit and serves as a guide for the eyes.
